# Supplementary material for: RIP-Chip analysis supports different roles for AGO2 and GW182 proteins in recruiting and processing microRNA targets
Source: PubMed Central journal article supplement (PMC6471694; doi:10.1186/s12859-019-2683-y), 2019-04-18

**corr(all) = 0.667 ; corr(top100) = 0.681 ; corr(top50) = 0.605**

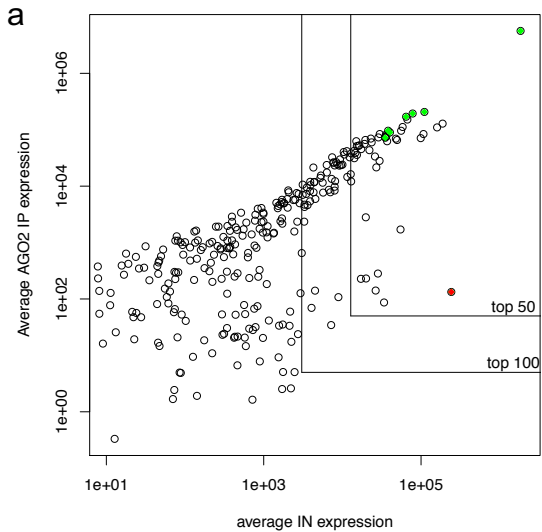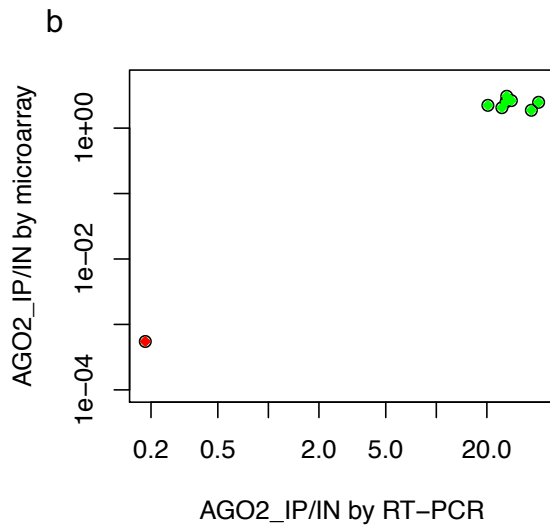

**corr(all) = 0.777 ; corr(top100) = 0.77 ; corr(top50) = 0.702**

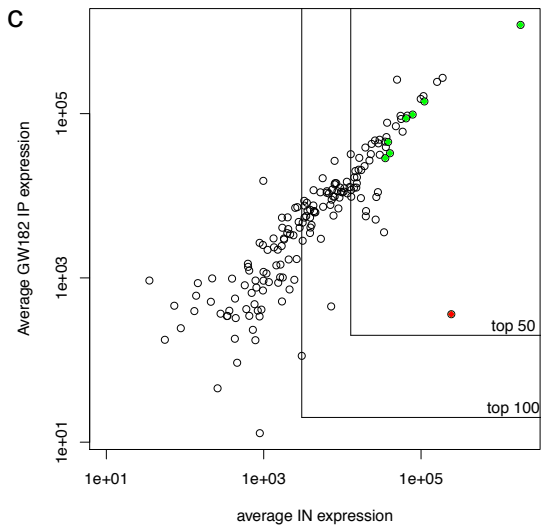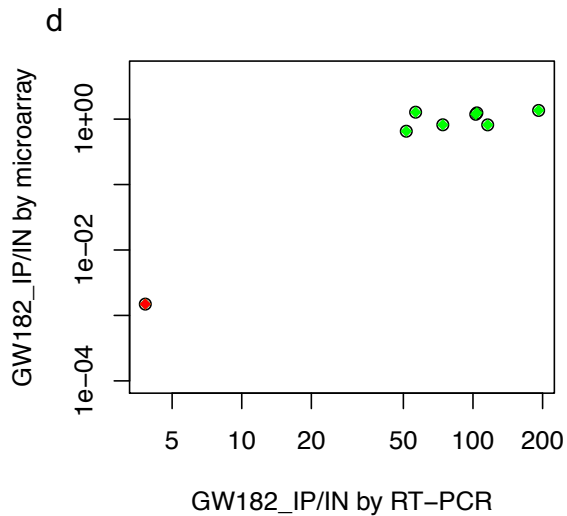

Supplement: 12859_2019_2683_MOESM1_ESM.pdf [file 12859_2019_2683_MOESM1_ESM.pdf]
