# Supplementary material for: RIP-Chip analysis supports different roles for AGO2 and GW182 proteins in recruiting and processing microRNA targets
Source: PubMed Central journal article supplement (PMC6471694; doi:10.1186/s12859-019-2683-y), 2019-04-18

Universe = 16363 genes

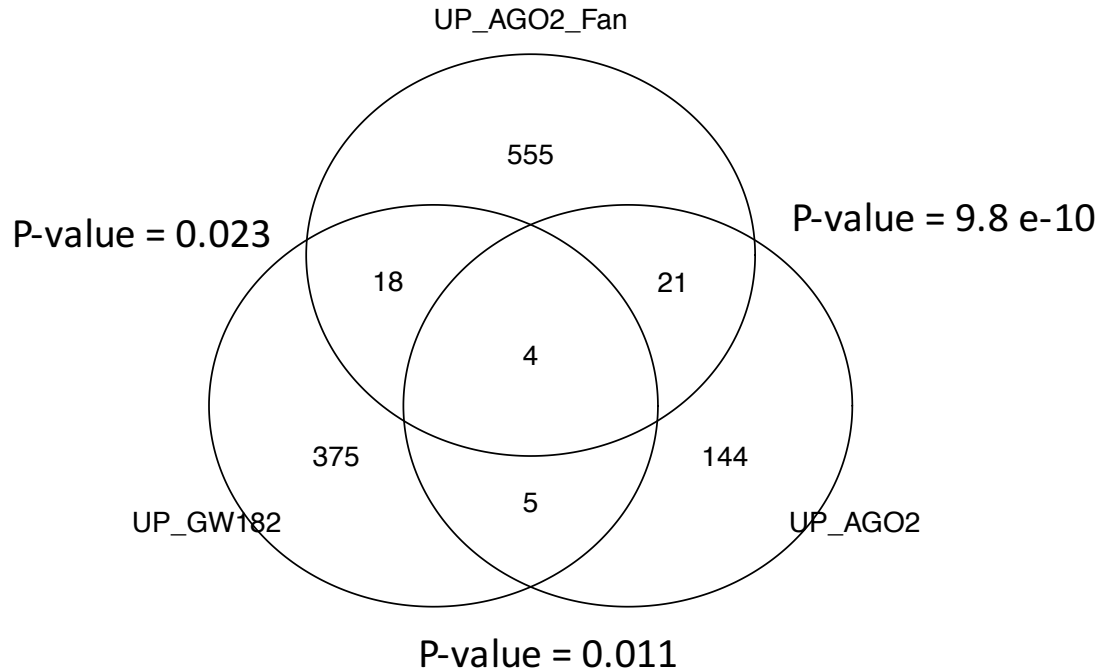

Supplement: 12859_2019_2683_MOESM5_ESM.pdf [file 12859_2019_2683_MOESM5_ESM.pdf]
