# Supplementary material for: RIP-Chip analysis supports different roles for AGO2 and GW182 proteins in recruiting and processing microRNA targets
Source: PubMed Central journal article supplement (PMC6471694; doi:10.1186/s12859-019-2683-y), 2019-04-18

a) Simulated F6 variable distinguishing AGO2 enriched vs underrepresented genes

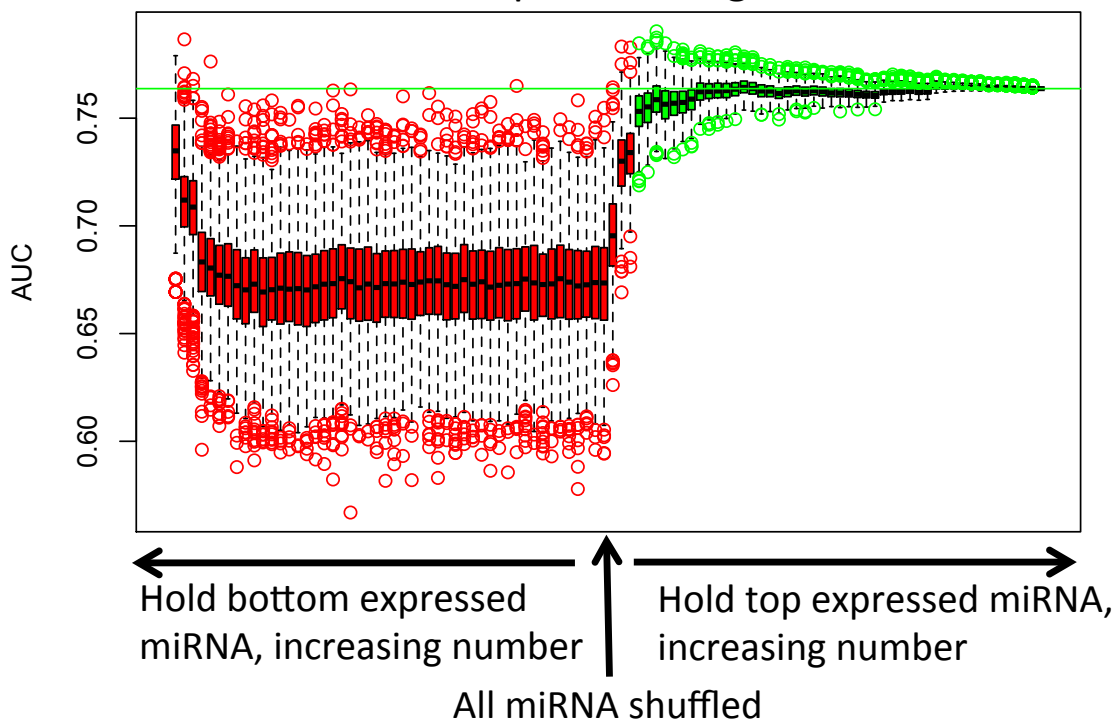

b) Simulated F6 variable distinguishing GW182 enriched vs underrepresented genes

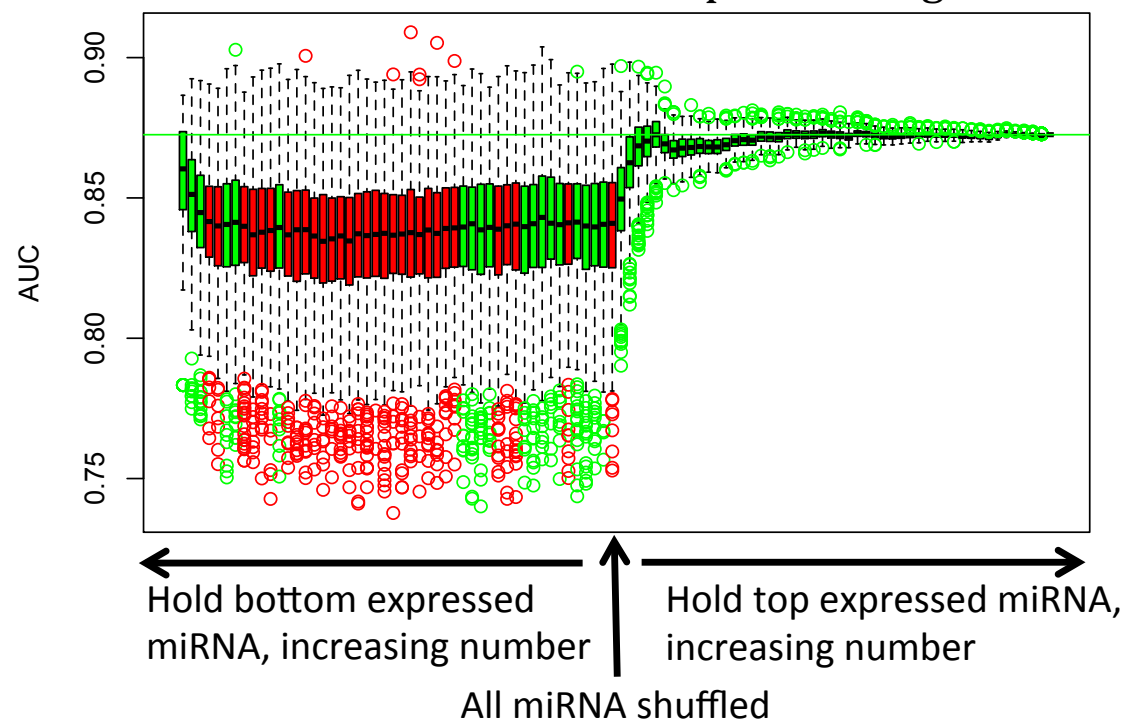

c) Simulated F4d variable distinguishing AGO2 enriched vs underrepresented genes

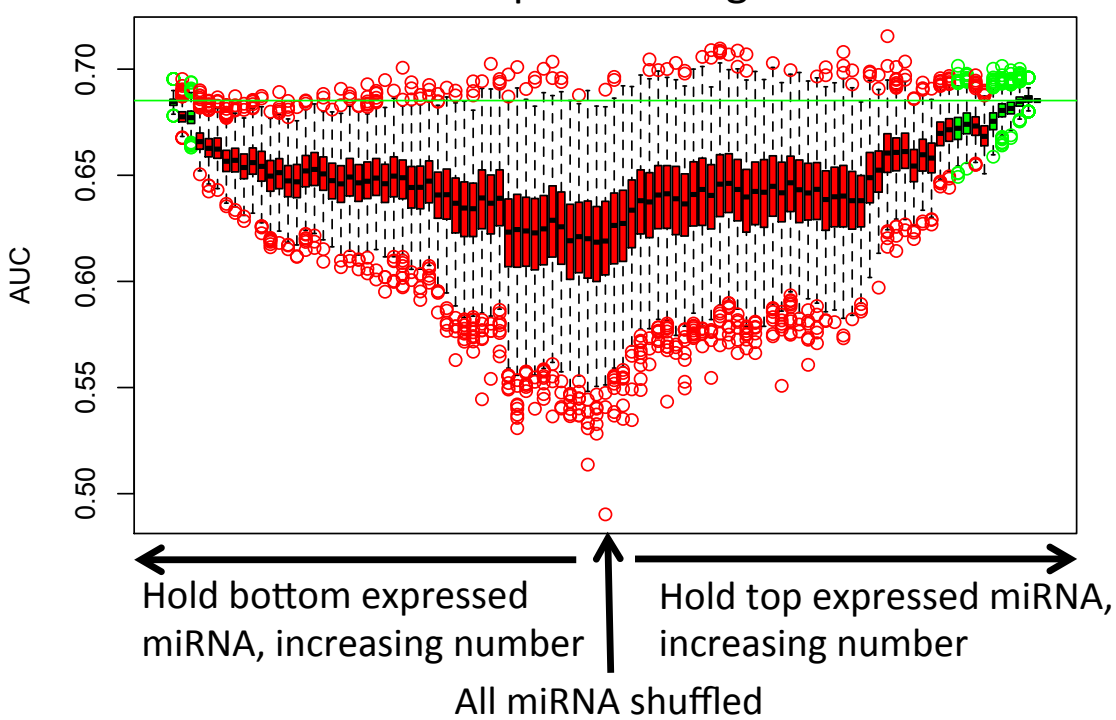

d) Simulated F6&F4d SVM model distinguishing AGO2 enriched vs underrepresented genes

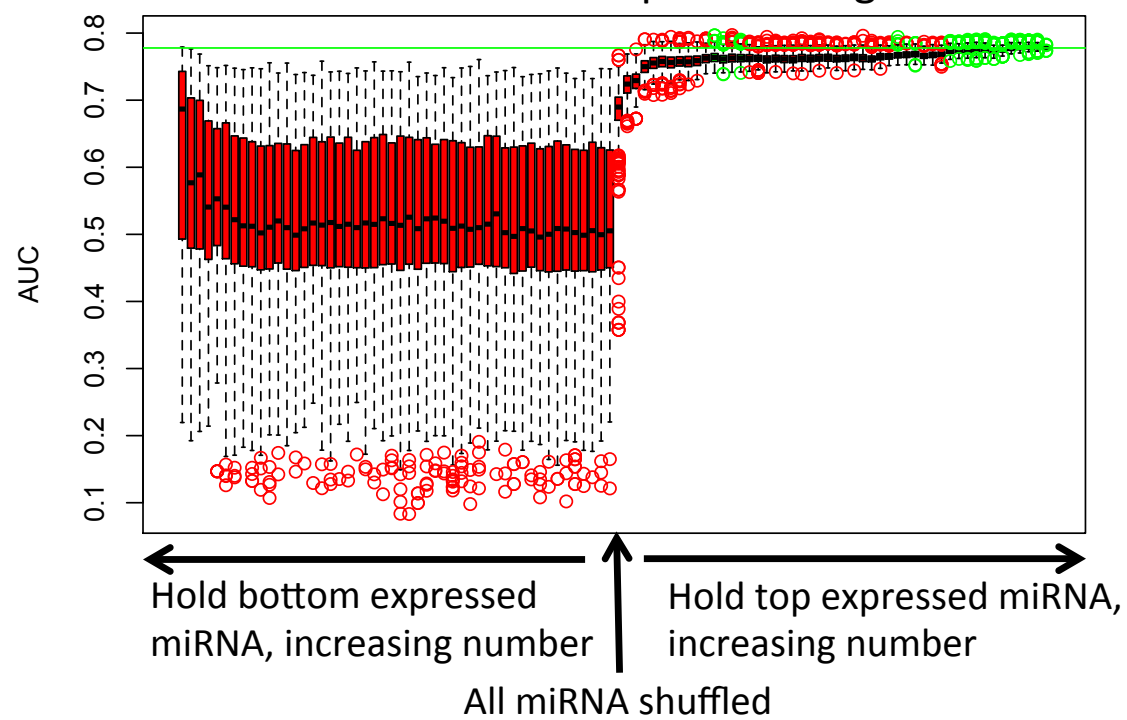

Supplement: 12859_2019_2683_MOESM7_ESM.pdf [file 12859_2019_2683_MOESM7_ESM.pdf]
