# Supplementary material for: RIP-Chip analysis supports different roles for AGO2 and GW182 proteins in recruiting and processing microRNA targets
Source: PubMed Central journal article supplement (PMC6471694; doi:10.1186/s12859-019-2683-y), 2019-04-18
Supplement: 12859_2019_2683_MOESM9_ESM.pdf [file 12859_2019_2683_MOESM9_ESM.pdf]

# miRNA expression profile from IN sample of:

IN\_1

IN\_2

IN\_3

**AUC = 0.58**

**AUC = 0.54**

**AUC = 0.51**

RIP\_1

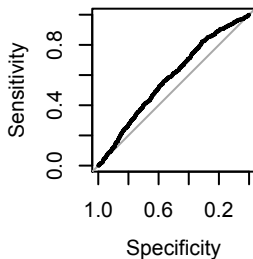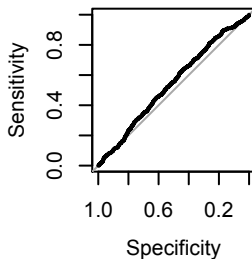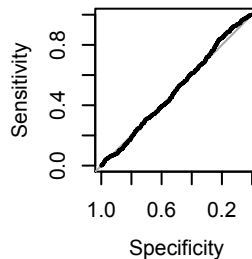

**AUC = 0.69**

**AUC = 0.72**

**AUC = 0.68**

RIP\_2

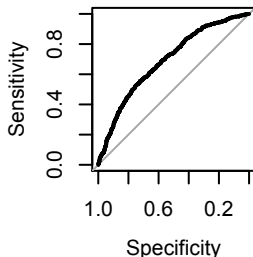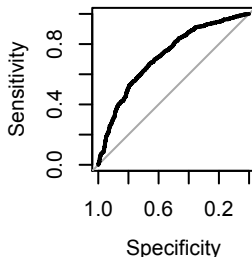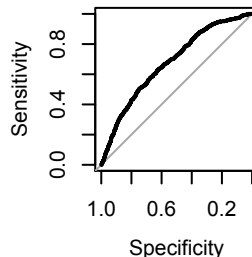

**AUC = 0.74**

**AUC = 0.76**

**AUC = 0.77**

RIP\_3

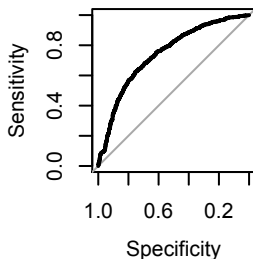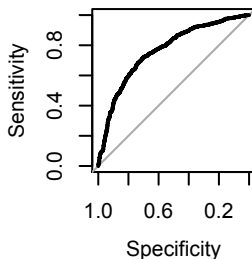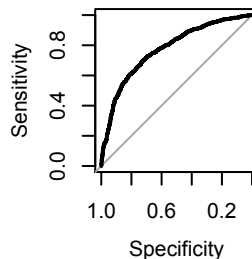

IP/FT ratio computed in experiment:
